# Supplementary material for: Identification and seasonality of rhinovirus and respiratory syncytial virus in asthmatic children in tropical climate
Source: Oxford University Press journal article supplement (doi:10.1042/bsr20200634), 2020-09-01

**Supplementary figure.** Relationship between children with RV and RSV infections and age.

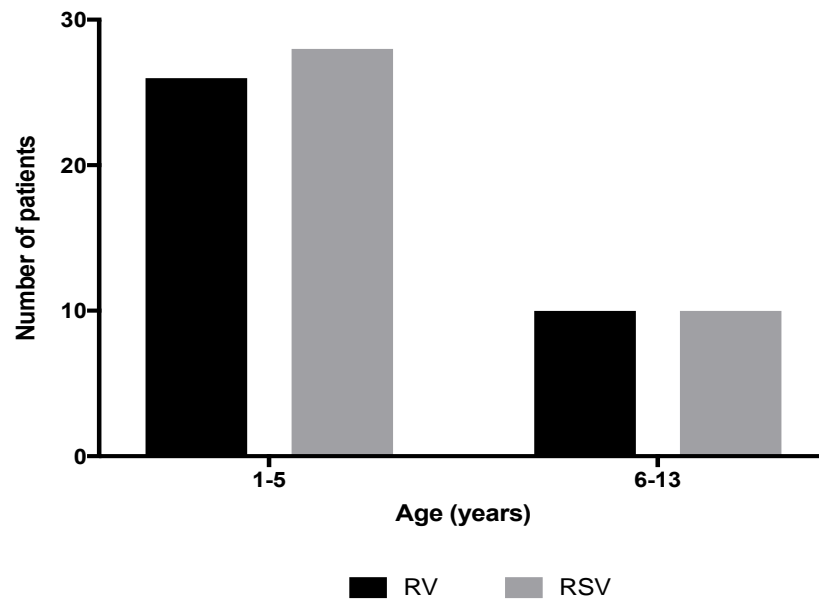

Supplement: bsr-2020-0634_supp.pdf [file bsr-2020-0634_supp.pdf]
